# Supplementary material for: Determining the Plio-Quaternary uplift of the southern French Massif Central; a new insight for intraplate orogen dynamics
Source: Copernicus journal article supplement (doi:10.5194/se-11-241-2020), 2020-02-26
Supplement: Supplementary file 1 [file se-11-241-2020-supplement.zip]

|                      | Magnetic parameters |        |       |      |                  |     | Geometric parameters |                          |
|----------------------|---------------------|--------|-------|------|------------------|-----|----------------------|--------------------------|
| Sample               | n                   | D      | I     | MAD  | AF (mT) interval |     | Elevation a,b,l, (m) | Cave location            |
| <b>Garrel Cave</b>   |                     |        |       |      |                  |     |                      |                          |
| <b>3BP01</b>         | 10                  | 4,7    | 51,4  | 1,8  | 8                | 54  | 20                   | Lower level              |
| <b>3BP02</b>         | 9                   | 0,0    | 55,1  | 1,9  | 12               | 54  | 20                   | Lower level              |
| <b>3BP03</b>         | 9                   | 2,7    | 55,8  | 1,7  | 12               | 54  | 20                   | Lower level              |
| <b>3BP04</b>         | 9                   | 4,9    | 55,4  | 1,0  | 12               | 54  | 20                   | Lower level              |
| <b>3BP05</b>         | 9                   | 6,4    | 56,0  | 1,0  | 12               | 54  | 20                   | Lower level              |
| <b>3BP06</b>         | 8                   | 8,6    | 59,2  | 1,5  | 16               | 54  | 20                   | Lower level              |
| <b>3BP07</b>         | 5                   | 19,3   | 58,1  | 6,6  | 30               | 54  | 20                   | Lower level              |
| <b>5B004</b>         | 9                   | -2,5   | 50,5  | 0,7  | 12               | 54  | 20                   | Lower level              |
| <b>5B005</b>         | 9                   | 7,1    | 57,6  | 1,0  | 12               | 54  | 20                   | Lower level              |
| <b>5B006</b>         | 8                   | -0,9   | 55,6  | 1,5  | 12               | 48  | 20                   | Lower level              |
| <b>5B007</b>         | 9                   | 2,8    | 53,4  | 1,1  | 12               | 54  | 20                   | Lower level              |
| <b>5B008</b>         | 9                   | 4,8    | 53,3  | 1,2  | 12               | 54  | 20                   | Lower level              |
| <b>5B009</b>         | 8                   | 13,7   | 45,7  | 3,3  | 16               | 54  | 20                   | Lower level              |
| <b>5B010</b>         | 4                   | 3,4    | 50,2  | 6,5  | 30               | 48  | 20                   | Lower level              |
| <b>6A003</b>         | 8                   | 3,7    | 58,3  | 2,4  | 20               | 95  | 20                   | Lower level              |
| <b>6A004</b>         | 9                   | 9,3    | 59,2  | 1,2  | 15               | 95  | 20                   | Lower level              |
| <b>6A005</b>         | 11                  | 9,5    | 57,2  | 0,8  | 15               | 130 | 20                   | Lower level              |
| <b>6A006</b>         | 9                   | 6,9    | 54,6  | 1,1  | 15               | 95  | 20                   | Lower level              |
| <b>6A007</b>         | 9                   | 5,5    | 55,9  | 0,8  | 15               | 95  | 20                   | Lower level              |
| <b>6A008</b>         | 9                   | 5,9    | 55,6  | 0,7  | 15               | 95  | 20                   | Lower level              |
| <b>6A009</b>         | 9                   | 10,4   | 56,0  | 0,7  | 15               | 95  | 20                   | Lower level              |
| <b>6A010</b>         | 9                   | 15,0   | 55,4  | 0,7  | 15               | 95  | 20                   | Lower level              |
| <b>6A011</b>         | 8                   | 15,3   | 68,3  | 3,0  | 10               | 65  | 20                   | Lower level              |
| <b>G1904</b>         | 9                   | 27,5   | 57,7  | 1,9  | 12               | 54  | 20                   | Lower level              |
| <b>G1905</b>         | 9                   | 24,6   | 53,5  | 1,5  | 12               | 54  | 20                   | Lower level              |
| <b>G1906</b>         | 9                   | 25,5   | 50,6  | 2,7  | 12               | 54  | 20                   | Lower level              |
| <b>G1907</b>         | 6                   | 22,0   | 47,2  | 5,3  | 24               | 54  | 20                   | Lower level              |
| <b>G1908</b>         | 8                   | 19,1   | 52,5  | 2,1  | 16               | 54  | 20                   | Lower level              |
| <b>G1909</b>         | 7                   | 24,1   | 55,1  | 1,4  | 16               | 54  | 20                   | Lower level              |
| <b>G1910</b>         | 9                   | 23,6   | 57,4  | 1,6  | 12               | 54  | 20                   | Lower level              |
| <b>G1911</b>         | 9                   | 10,5   | 59,5  | 1,3  | 12               | 54  | 20                   | Lower level              |
| <b>G1912</b>         | 8                   | 7,7    | 57,2  | 1,5  | 12               | 48  | 20                   | Lower level              |
| <b>G1913</b>         | 9                   | 11,5   | 55,8  | 0,9  | 12               | 54  | 20                   | Lower level              |
| <b>G1914</b>         | 8                   | 4,3    | 53,7  | 1,4  | 8                | 54  | 20                   | Lower level              |
| <b>G1915</b>         | 8                   | -4,8   | 53,3  | 1,4  | 12               | 48  | 20                   | Lower level              |
| <b>03CAR</b>         | 9                   | 3,9    | 63,8  | 12,8 | 6                | 80  | 40                   | “Carrefour”              |
| <b>01LPP</b>         | 8                   | 154,9  | -50,3 | 3,7  | 24               | 100 | 93                   | Higher level             |
| <b>02LPP</b>         | 8                   | 10,9   | 51,4  | 5,5  | 12               | 100 | 78                   | Higher level             |
| <b>03LPP</b>         | 4                   | -22,0  | 59,7  | 5,4  | 6                | 40  | 78                   | Higher level             |
| <b>01LUN</b>         | 3                   | -177,8 | -48,4 | 11,2 | 70               | 100 | 35                   | “La lunette”             |
| <b>Leicasse Cave</b> |                     |        |       |      |                  |     |                      |                          |
| <b>LAB01</b>         | 6                   | -8,7   | 60,8  | 1,5  | 10               | 50  | 252                  | “Coulée Borg” access     |
| <b>LAB03</b>         | 4                   | 164,2  | -14,7 | 12,1 | 40               | 70  | 252                  | “Coulée Borg” access     |
| <b>LAB04</b>         | 5                   | -151,1 | -16,0 | 10,4 | 30               | 70  | 252                  | “Coulée Borg” access     |
| <b>LAB05</b>         | 3                   | -165,5 | -26,9 | 1,7  | 40               | 60  | 252                  | “Coulée Borg” access     |
| <b>LAB06</b>         | 5                   | -166,4 | -67,0 | 5,9  | 30               | 70  | 252                  | “Coulée Borg” access     |
| <b>LAB07</b>         | 3                   | -136,5 | -68,6 | 10,6 | 30               | 50  | 252                  | “Coulée Borg” access     |
| <b>LAB09</b>         | 4                   | 124,3  | -23,9 | 21,2 | 40               | 70  | 252                  | “Coulée Borg” access     |
| <b>LAB10</b>         | 5                   | -162,9 | -51,4 | 5,5  | 30               | 70  | 252                  | “Coulée Borg” access     |
| <b>LAB11</b>         | 4                   | 111,5  | -35,1 | 9,6  | 40               | 70  | 252                  | “Coulée Borg” access     |
| <b>LAB12</b>         | 4                   | 106,7  | -25,1 | 11,6 | 40               | 70  | 252                  | “Coulée Borg” access     |
| <b>LAR01</b>         | 5                   | -12,6  | 75,8  | 34,9 | 30               | 70  | 200                  | “Araignée Rouge” network |
| <b>LAR02</b>         | 7                   | -16,6  | 49,9  | 6,1  | 15               | 70  | 200                  | “Araignée Rouge” network |

|               | Magnetic parameters |        |       |      |    |     | Geometric parameters |                            |
|---------------|---------------------|--------|-------|------|----|-----|----------------------|----------------------------|
| <b>LAR03</b>  | 7                   | -6,9   | 54,5  | 2,9  | 15 | 70  | 200                  | “Araignée Rouge” network   |
| <b>LAR04</b>  | 6                   | -16,7  | 46,7  | 2,2  | 20 | 70  | 200                  | “Araignée Rouge” network   |
| <b>LAR05</b>  | 7                   | -13,7  | 25,0  | 2,5  | 15 | 70  | 200                  | “Araignée Rouge” network   |
| <b>LAR06</b>  | 7                   | 2,3    | 48,6  | 1,7  | 15 | 70  | 200                  | “Araignée Rouge” network   |
| <b>LAR07</b>  | 8                   | -27,7  | 42,3  | 2,1  | 10 | 70  | 200                  | “Araignée Rouge” network   |
| <b>LAR07</b>  | 4                   | -18,0  | 40,1  | 12,1 | 40 | 70  | 200                  | “Araignée Rouge” network   |
| <b>LAR08</b>  | 4                   | 18,4   | 39,3  | 1,3  | 40 | 70  | 200                  | “Araignée Rouge” network   |
| <b>LAR09</b>  | 6                   | -21,2  | 71,7  | 1,2  | 20 | 70  | 200                  | “Araignée Rouge” network   |
| <b>LAR10</b>  | 7                   | 20,0   | 42,7  | 1,2  | 15 | 70  | 200                  | “Araignée Rouge” network   |
| <b>LAR11</b>  | 4                   | 3,6    | 34,0  | 4,4  | 40 | 70  | 200                  | “Araignée Rouge” network   |
| <b>LAR12</b>  | 8                   | 16,7   | 46,6  | 2,5  | 10 | 70  | 200                  | “Araignée Rouge” network   |
| <b>LBB01</b>  | 6                   | -16,8  | 46,0  | 3,2  | 20 | 70  | 240                  | “Le Bidon Bleu”            |
| <b>LBB02*</b> | 5                   | 175,5  | -9,3  | 1,9  | 30 | 70  | 240                  | “Le Bidon Bleu”            |
| <b>LBB03</b>  | 5                   | 165,4  | -20,7 | 1,6  | 30 | 70  | 240                  | “Le Bidon Bleu”            |
| <b>LBB04</b>  | 4                   | 170,4  | -20,5 | 1,3  | 40 | 70  | 240                  | “Le Bidon Bleu”            |
| <b>LBB05</b>  | 5                   | 178,3  | -18,3 | 0,7  | 30 | 70  | 240                  | “Le Bidon Bleu”            |
| <b>LBB06</b>  | 5                   | 179,8  | -15,0 | 3,4  | 30 | 70  | 240                  | “Le Bidon Bleu”            |
| <b>LBB07*</b> | 4                   | -166,2 | -4,0  | 2,7  | 40 | 70  | 240                  | “Le Bidon Bleu”            |
| <b>LBB08*</b> | 3                   | -175,4 | -0,3  | 4,9  | 50 | 70  | 240                  | “Le Bidon Bleu”            |
| <b>LBB09</b>  | 5                   | -23,2  | 62,0  | 3,3  | 30 | 70  | 240                  | “Le Bidon Bleu”            |
| <b>LBB11</b>  | 6                   | -51,1  | -73,2 | 9,6  | 20 | 70  | 240                  | “Le Bidon Bleu”            |
| <b>LBB12*</b> | 5                   | 32,9   | 10,7  | 6,7  | 30 | 70  | 240                  | “Le Bidon Bleu”            |
| <b>LCB01</b>  | 7                   | -8,6   | 27,3  | 1,7  | 15 | 70  | 265                  | “Coulée Borg”              |
| <b>LCB02</b>  | 7                   | -31,8  | 38,4  | 0,7  | 15 | 70  | 265                  | “Coulée Borg”              |
| <b>LCB03</b>  | 6                   | -26,5  | 31,3  | 1,6  | 20 | 70  | 265                  | “Coulée Borg”              |
| <b>LGM01*</b> | 5                   | 162,0  | 4,4   | 4,0  | 20 | 60  | 257                  | “Meulière” Galery          |
| <b>LGM02</b>  | 5                   | 167,1  | -16,6 | 4,6  | 30 | 70  | 257                  | “Meulière” Galery          |
| <b>LGM03</b>  | 5                   | 178,6  | -54,9 | 8,1  | 30 | 70  | 257                  | “Meulière” Galery          |
| <b>LGM04</b>  | 6                   | -177,2 | -23,9 | 2,2  | 20 | 70  | 257                  | “Meulière” Galery          |
| <b>LGM05</b>  | 5                   | 173,7  | -24,9 | 2,3  | 30 | 70  | 257                  | “Meulière” Galery          |
| <b>LGM06</b>  | 7                   | 167,3  | -46,3 | 2,6  | 15 | 70  | 257                  | “Meulière” Galery          |
| <b>LGM07</b>  | 6                   | -167,7 | -56,0 | 1,4  | 20 | 70  | 257                  | “Meulière” Galery          |
| <b>LGM08</b>  | 7                   | -166,0 | -37,2 | 1,4  | 15 | 70  | 257                  | “Meulière” Galery          |
| <b>LGM09</b>  | 7                   | -168,8 | -34,7 | 3,2  | 15 | 70  | 257                  | “Meulière” Galery          |
| <b>LGM10</b>  | 7                   | 172,2  | -43,2 | 1,1  | 15 | 70  | 257                  | “Meulière” Galery          |
| <b>LGM11</b>  | 6                   | 172,0  | -23,9 | 1,8  | 20 | 70  | 257                  | “Meulière” Galery          |
| <b>LGM12</b>  | 4                   | 169,1  | -40,5 | 2,9  | 40 | 70  | 257                  | “Meulière” Galery          |
| <b>LPE01*</b> | 5                   | -154,0 | -3,5  | 1,0  | 30 | 70  | 400                  | Down of the Entrance shaft |
| <b>LPE02*</b> | 4                   | -171,2 | -3,4  | 0,6  | 20 | 50  | 400                  | Down of the Entrance shaft |
| <b>LPE03</b>  | 5                   | 168,3  | -13,7 | 2,2  | 30 | 70  | 400                  | Down of the Entrance shaft |
| <b>LE101</b>  | 15,0                | -5,7   | 60,5  | 1,1  | 8  | 140 | 210                  | “Pous de la Ser”           |
| <b>LE102</b>  | 9,0                 | 4,8    | 55,8  | 4,6  | 20 | 80  | 210                  | “Pous de la Ser”           |
| <b>LE103</b>  | 8,0                 | -46,2  | 20,4  | 2,9  | 30 | 90  | 257                  | “Galerie des Dalles”       |
| <b>LE104</b>  | 12,0                | -107,6 | 44,4  | 2,9  | 24 | 150 | 257                  | “Galerie des Dalles”       |
| <b>LE105</b>  | 7,0                 | -42,0  | 9,5   | 3,4  | 60 | 150 | 260                  | “Les gours sur pattes”     |
| <b>LE106*</b> | 5,0                 | 164,0  | -17   | 2,7  | 70 | 150 | 260                  | “Les gours sur pattes”     |
| <b>LE107</b>  | 4,0                 | 153,7  | -23,9 | 3,6  | 90 | 150 | 260                  | “Meulière” Galery          |
| <b>LE108</b>  | 8,0                 | 122,6  | -47,3 | 8,5  | 48 | 150 | 260                  | “Meulière” Galery          |

Table 1: Table A1: Results of the Principal Component Analysis of the demagnetisation plots for individual samples. D and I are the declination and the inclination of the Characteristic Remanence in geographical reference frame, respectively. The treatment interval from which these directions are calculated, the Maximum Angular Deviation (MAD), and the number of treatment steps involved in the calculus are given to assess the quality of these determinations. We assume for some sample a compaction phenomenon (samples with asterisk)
