# Supplementary material for: Determining the Plio-Quaternary uplift of the southern French Massif Central; a new insight for intraplate orogen dynamics
Source: Copernicus journal article supplement (doi:10.5194/se-11-241-2020), 2020-02-26
Supplement: Supplementary file 2 [file se-11-241-2020-supplement.zip]

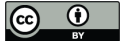

## *Supplement of*

# **Determining the Plio-Quaternary uplift of the southern French Massif Central; a new insight for intraplate orogen dynamics**

**Oswald Malcles et al.**

*Correspondence to:* Oswald Malcles ([oswald.malcles@umontpellier.fr](mailto:oswald.malcles@umontpellier.fr))

- [se-11-241-2020-supplement-title-page.pdf](#)
- Pictures\_Surface
  - [Fluvio-karstic\\_Surface.png](#)
  - [Mag\\_Tab\\_SupMat.pdf](#)
  - [Strath\\_Terrace.png](#)
- \_\_MACOSX
  - [.\\_Pictures\\_Surface](#)
  - [Pictures\\_Surface](#)
    - \* [.\\_Fluvio-karstic\\_Surface.png](#)
    - \* [.\\_Mag\\_Tab\\_SupMat.pdf](#)
    - \* [.\\_Strath\\_Terrace.png](#)

The copyright of individual parts of the supplement might differ from the CC BY 4.0 License.
